# Supplementary material for: S-Methyl-l-cysteine targeting MsrA attenuates Ang II-induced oxidative stress and atrial remodeling via the p38 MAPK signaling pathway
Source: Royal Society of Chemistry journal article supplement (doi:10.1039/d4fo03078h), 2024-01-01

Fig. 3C

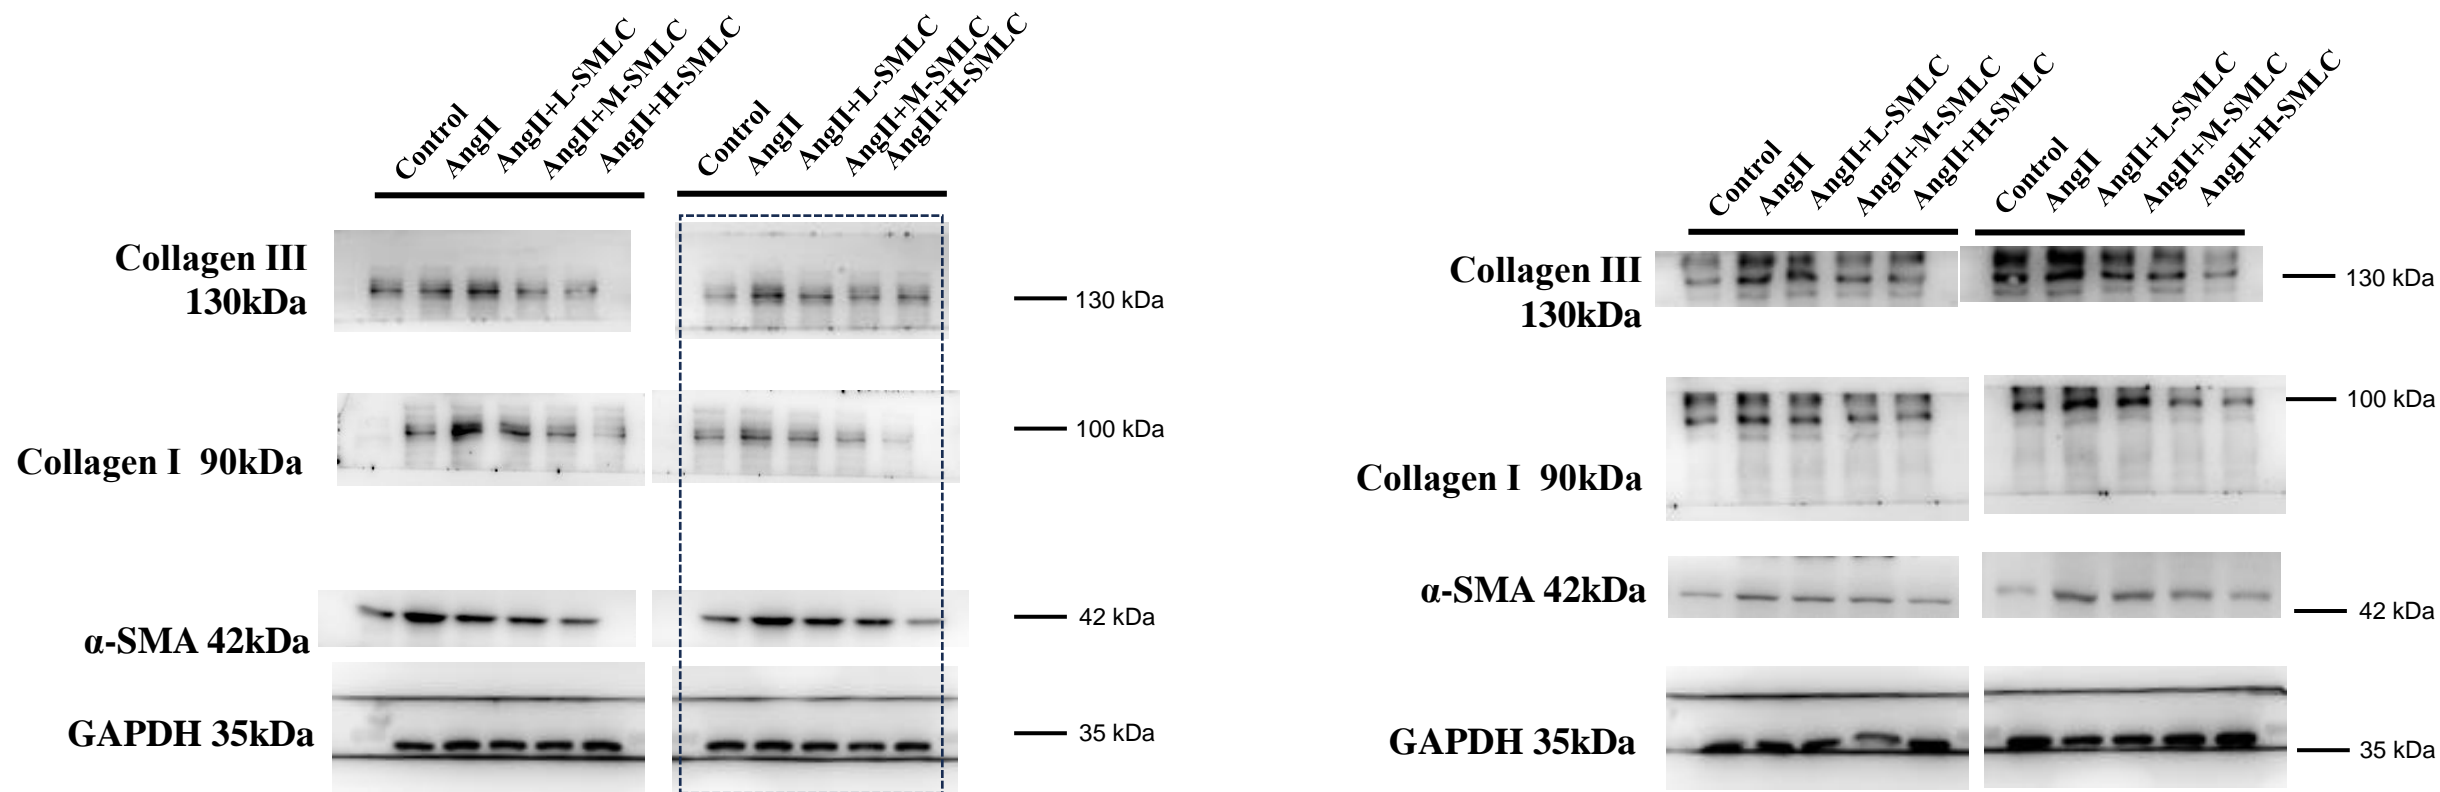

**Fig. 4D**

**Original figures of WB**

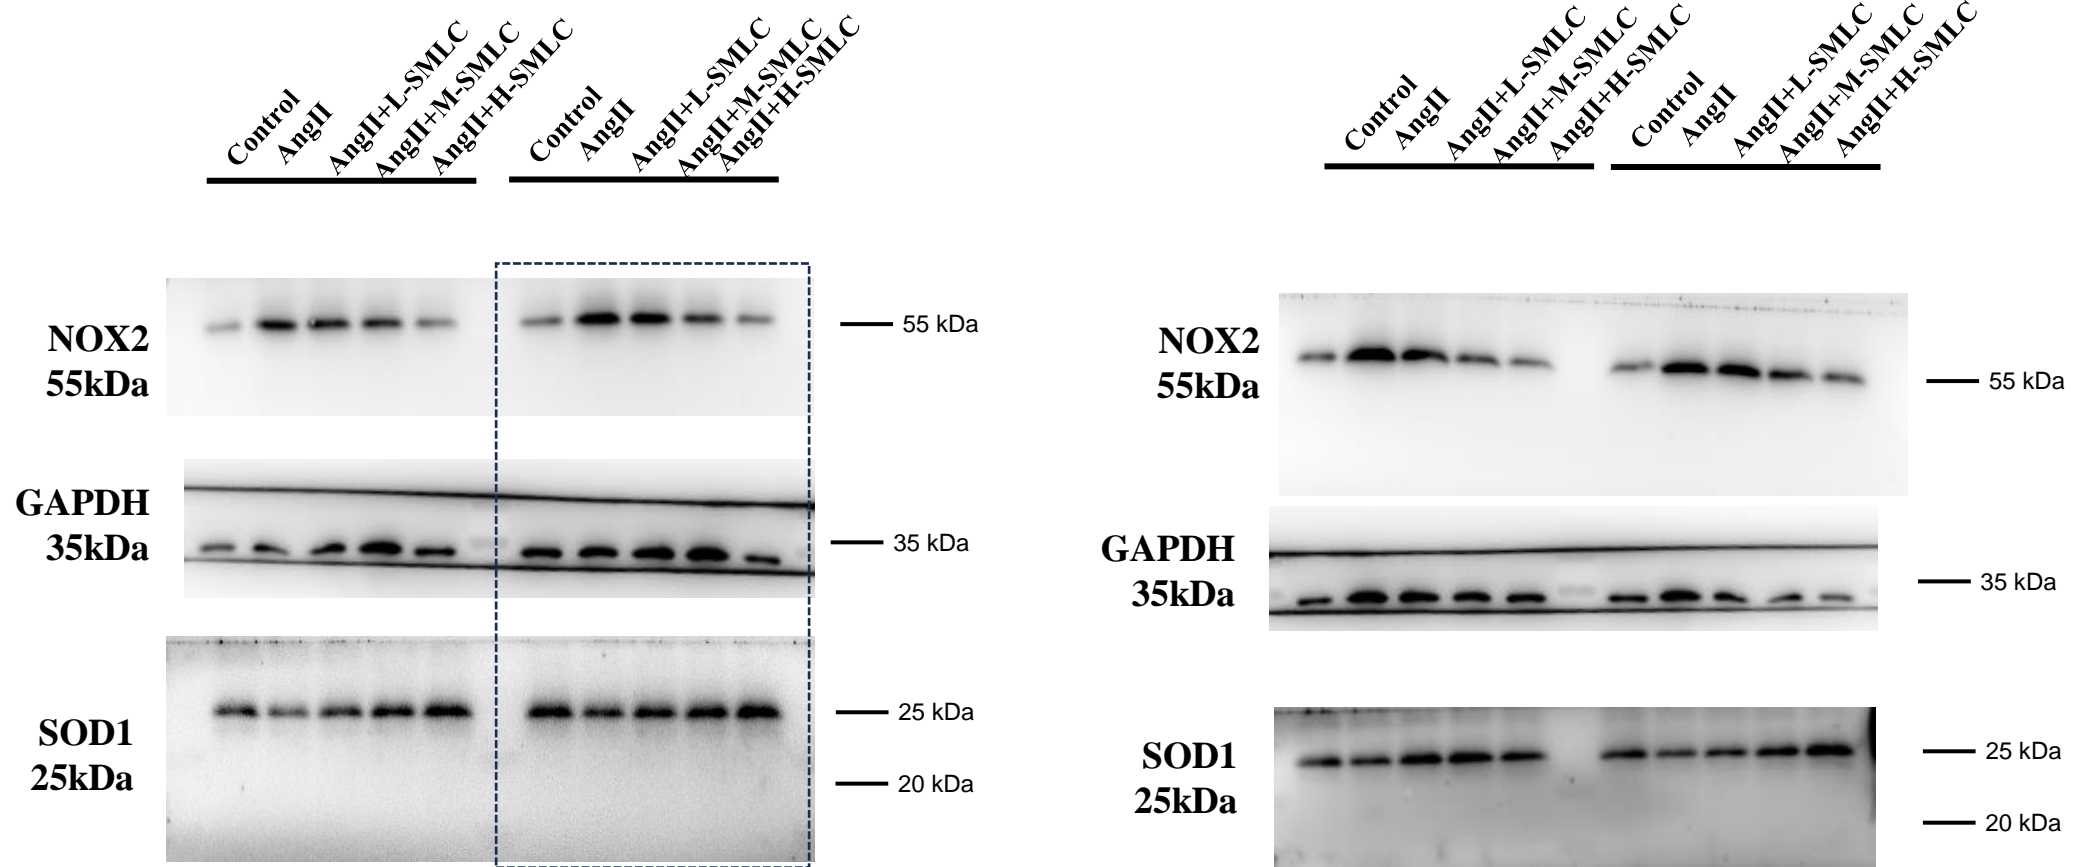

**Fig. 5A**

**Original figures of WB**

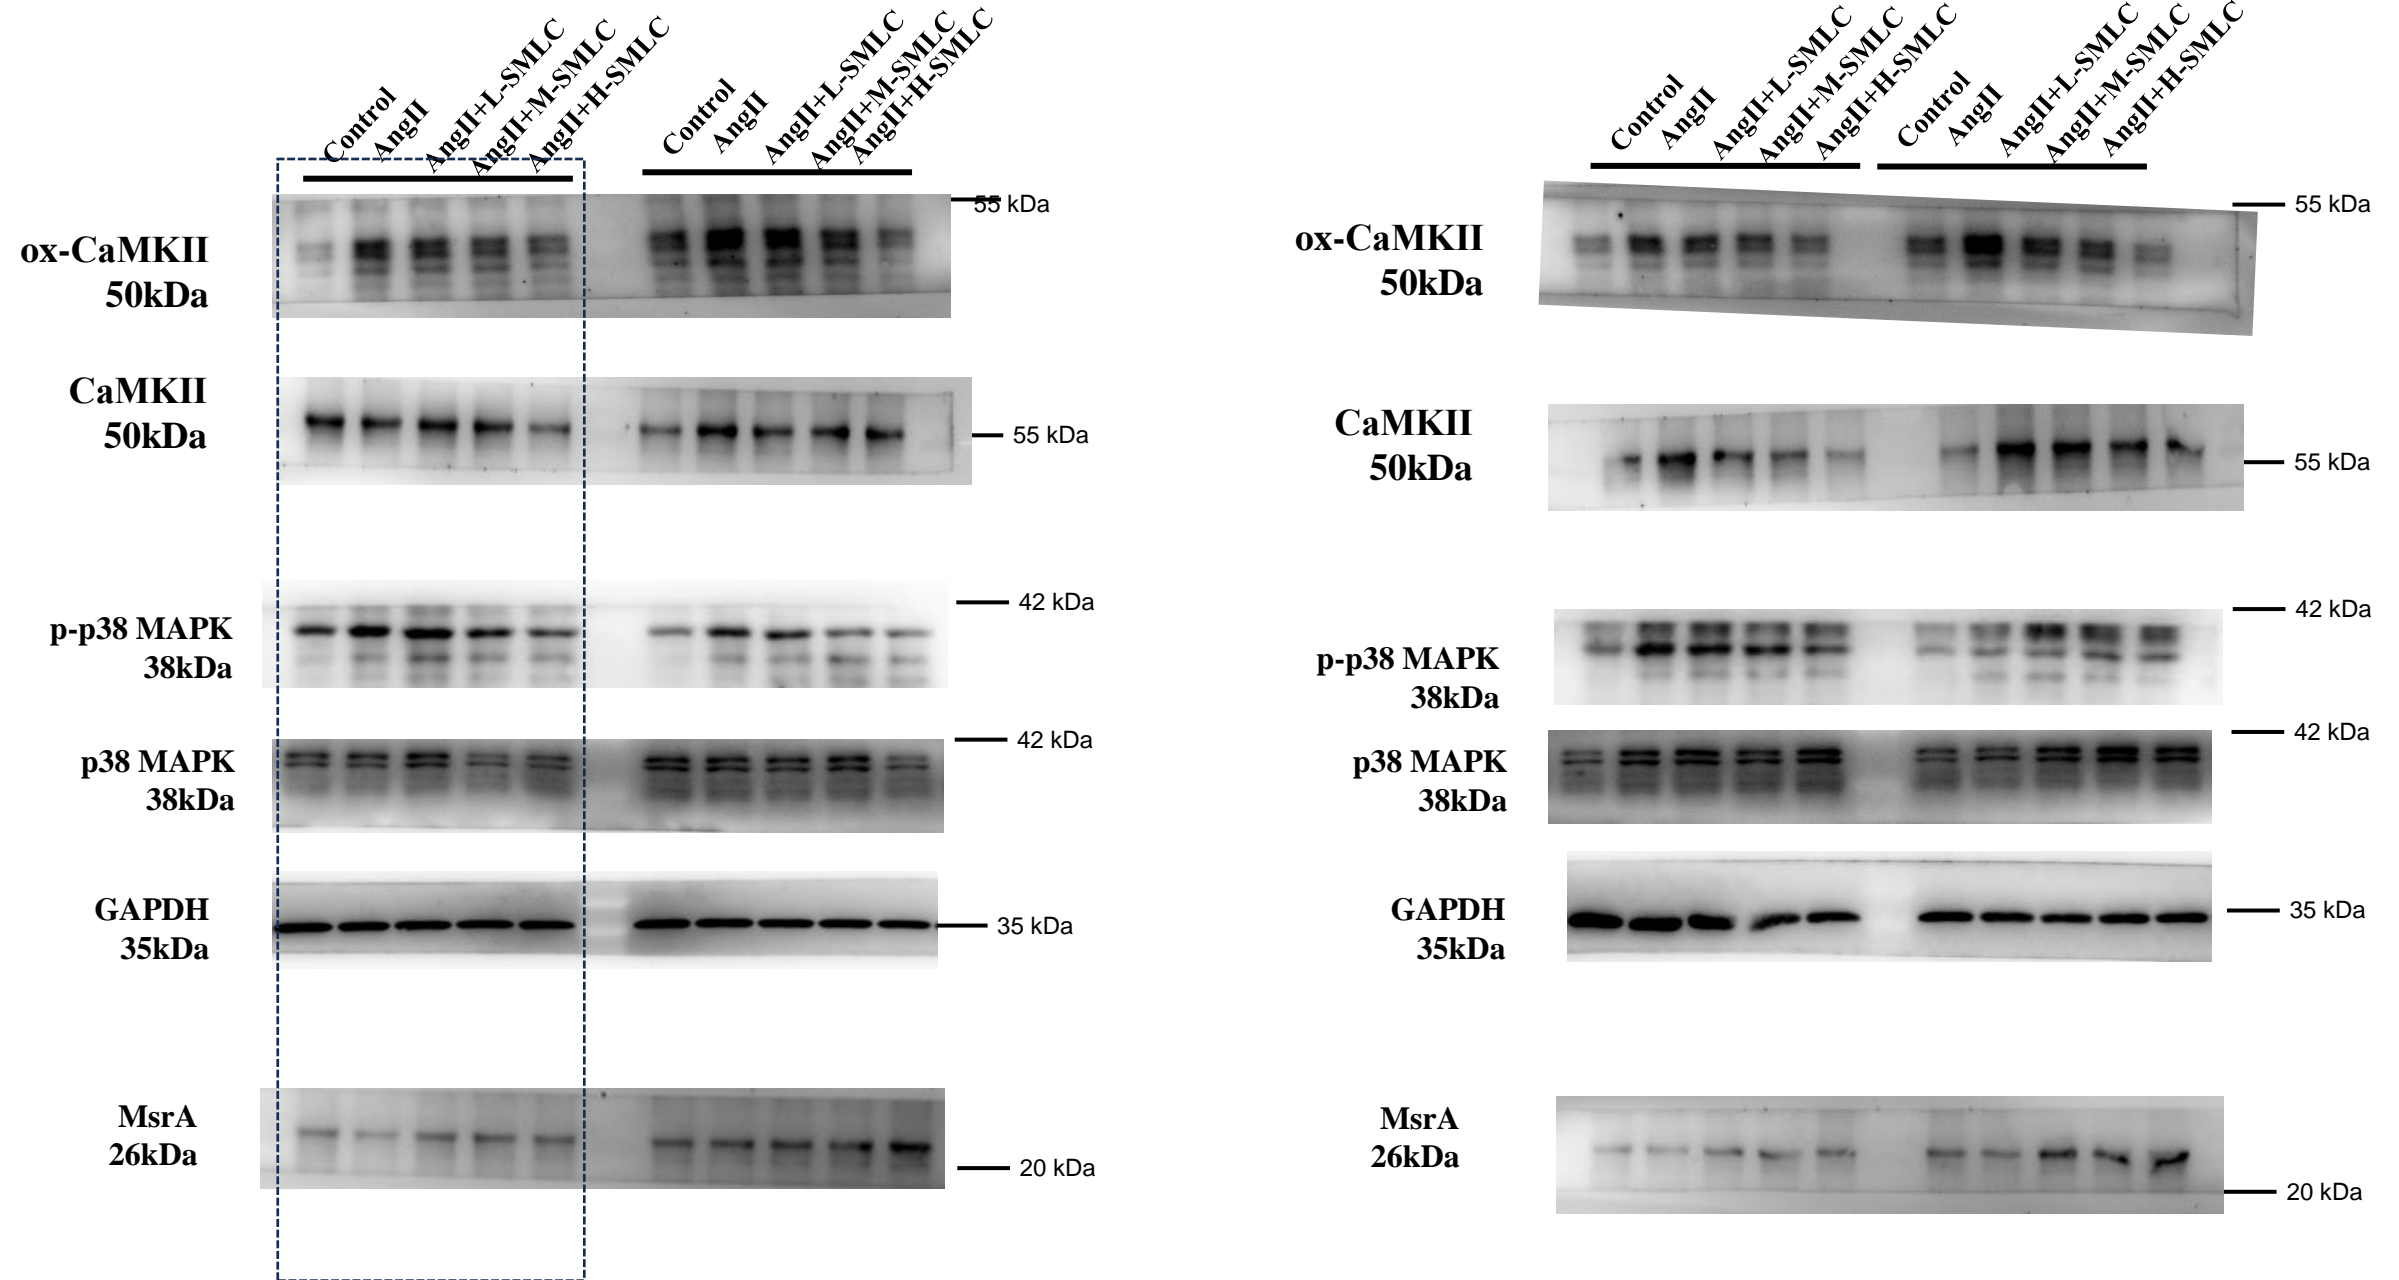

Original figures of WB

Fig. 6F

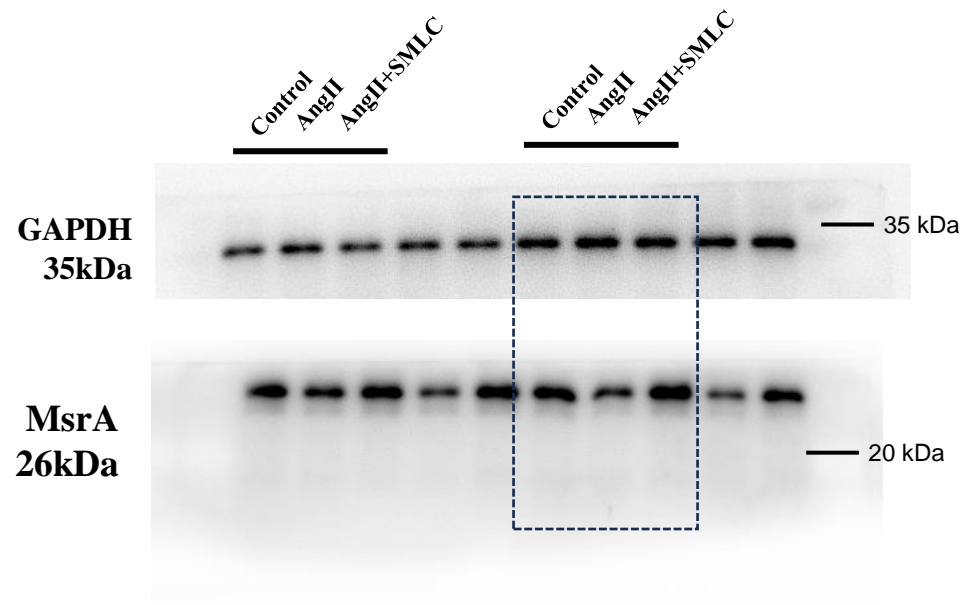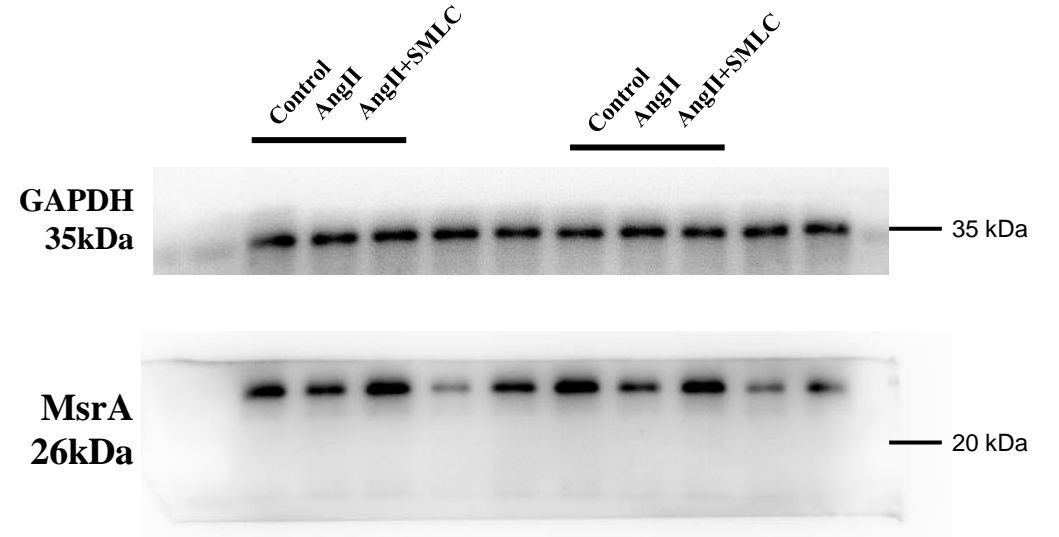

**Fig. 7D**

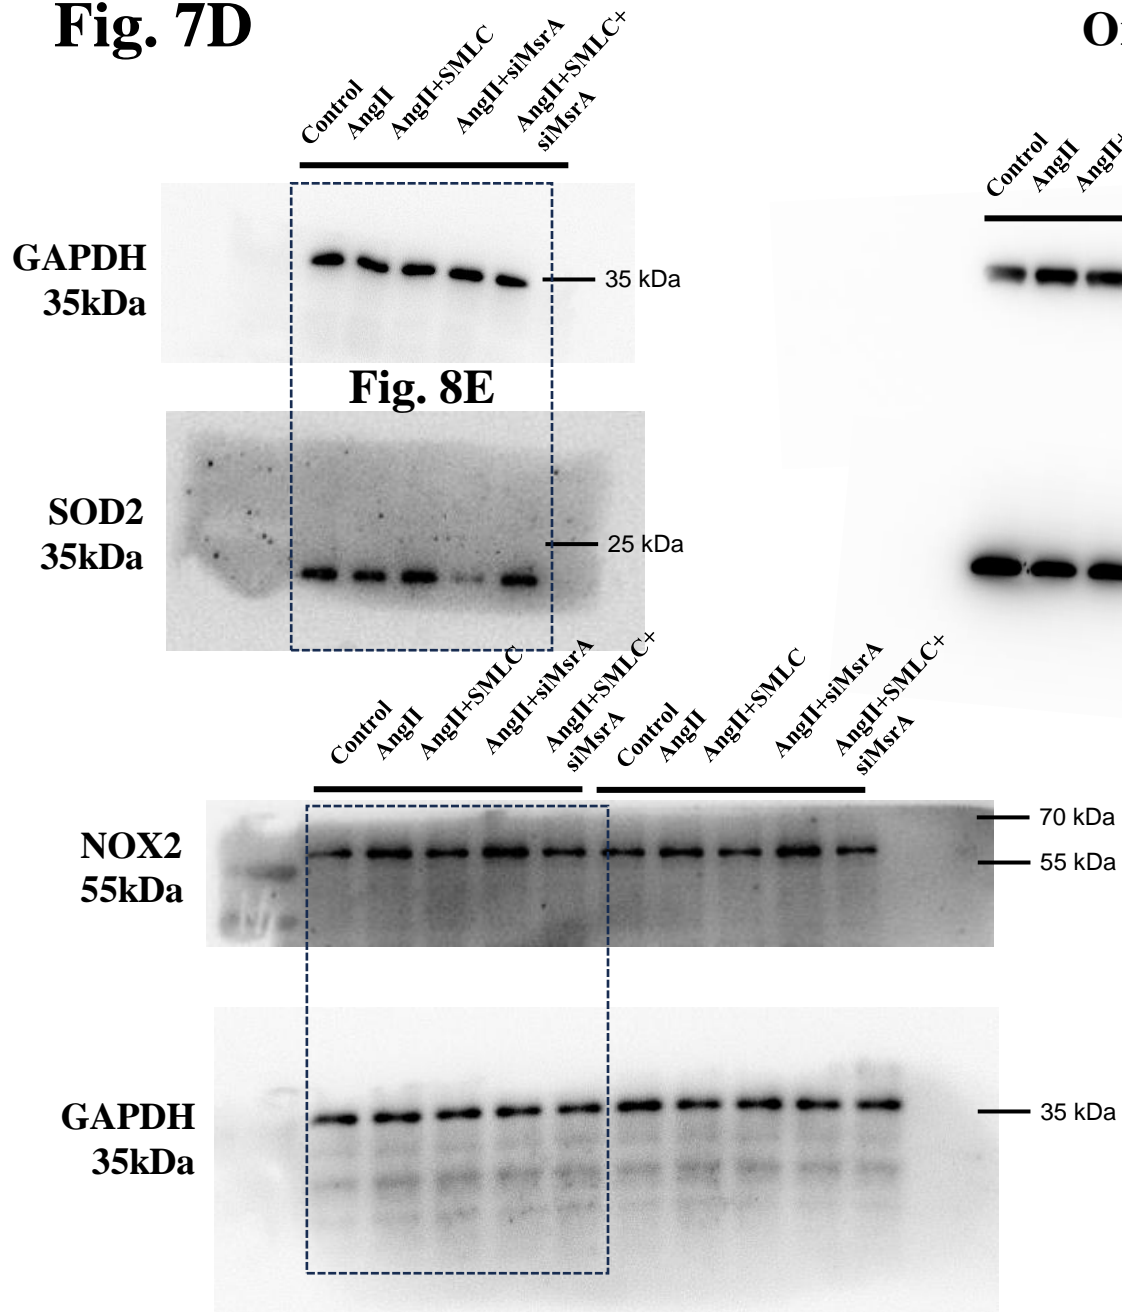

**Fig. 8E**

**Original figures of WB**

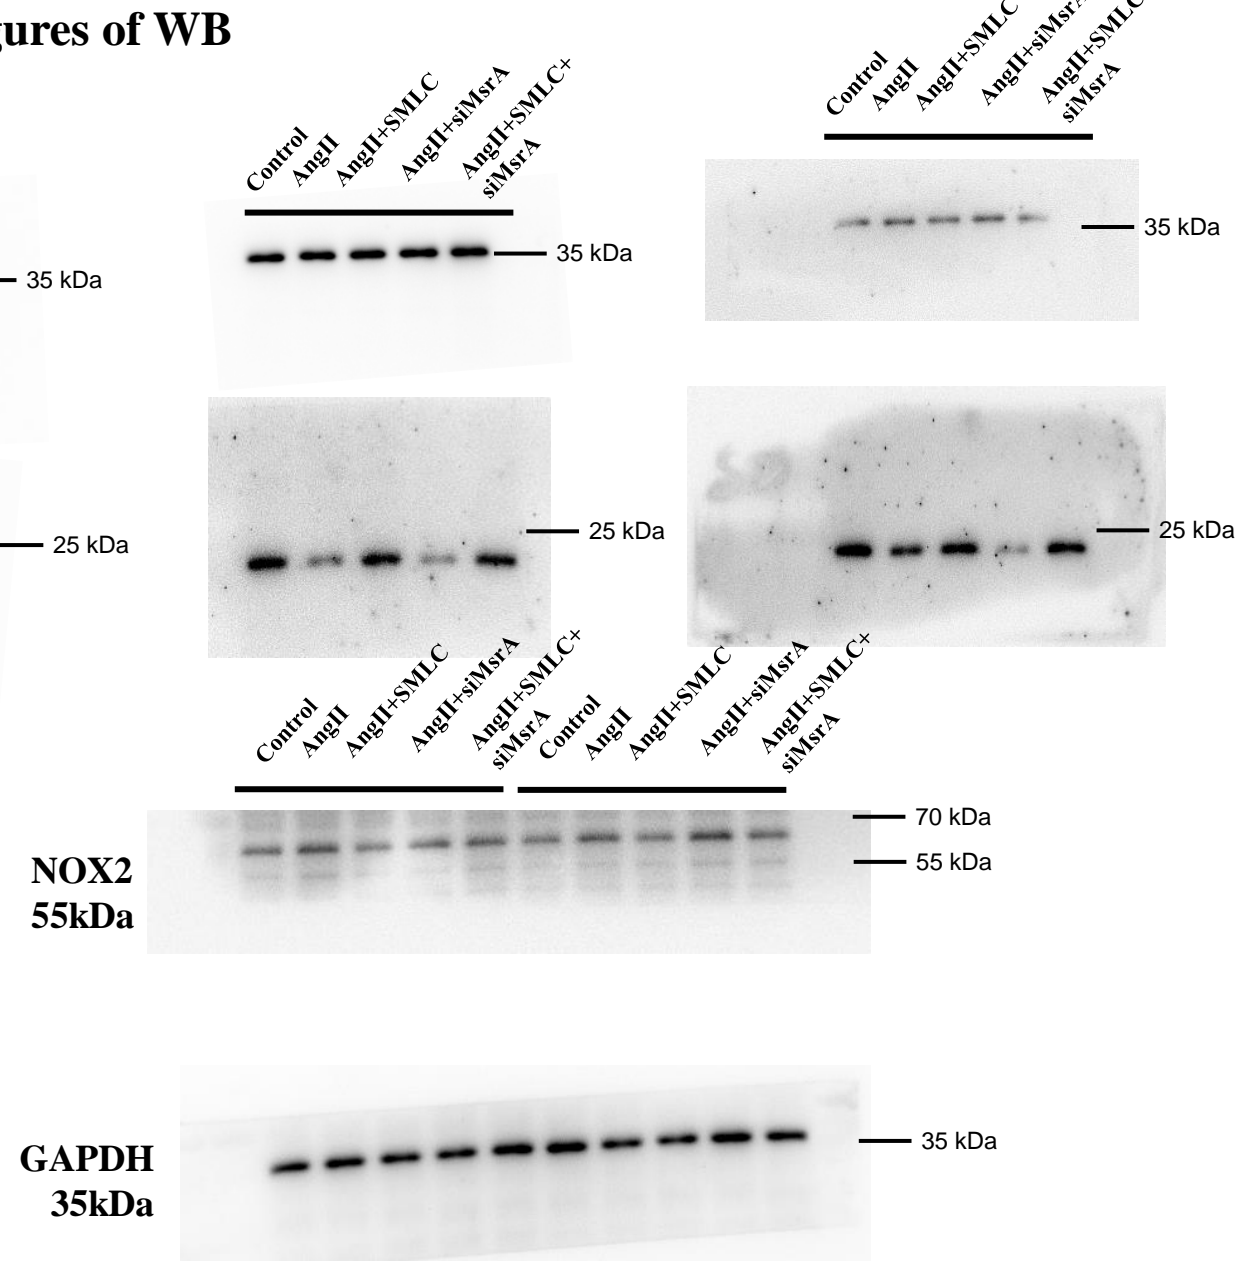

**Fig. 8D**

**Original figures of WB**

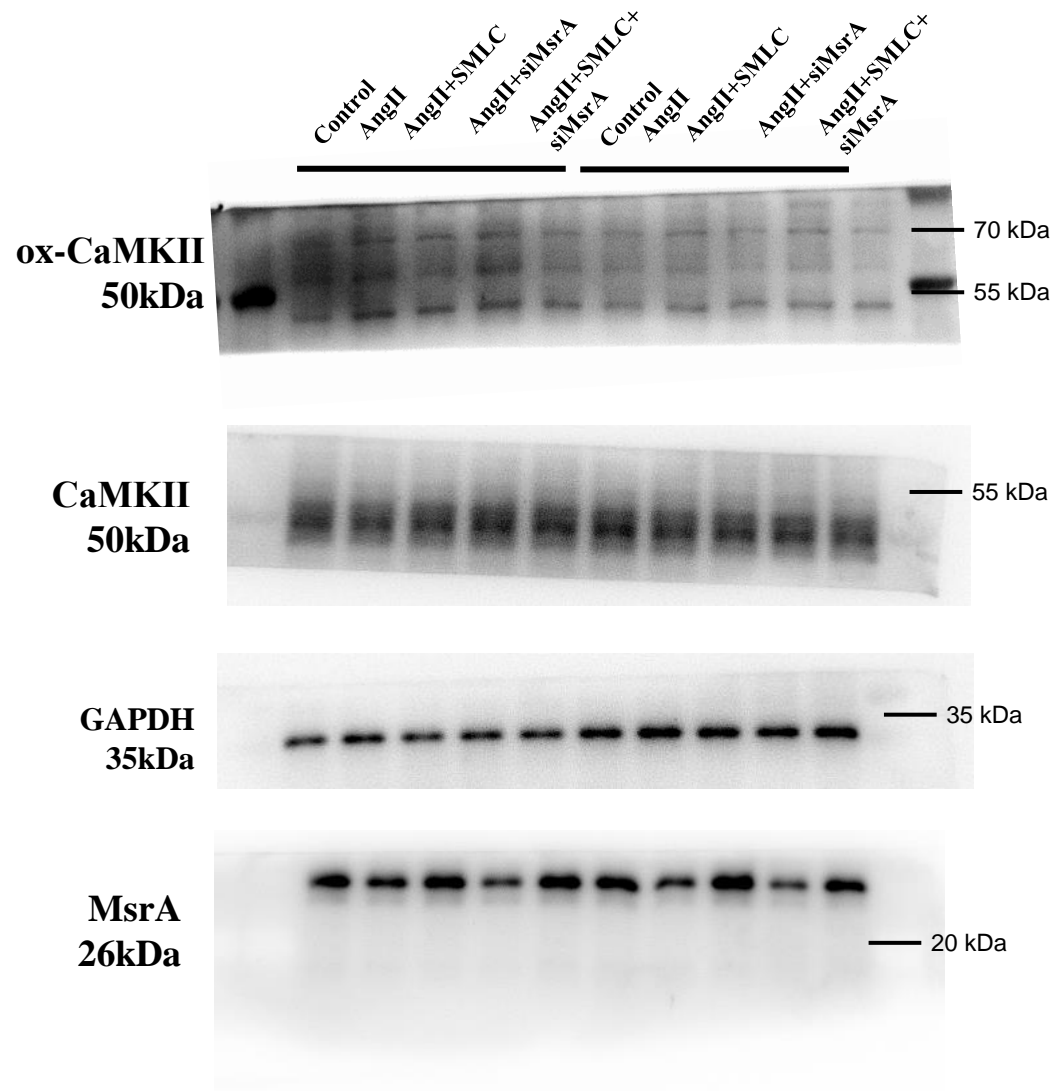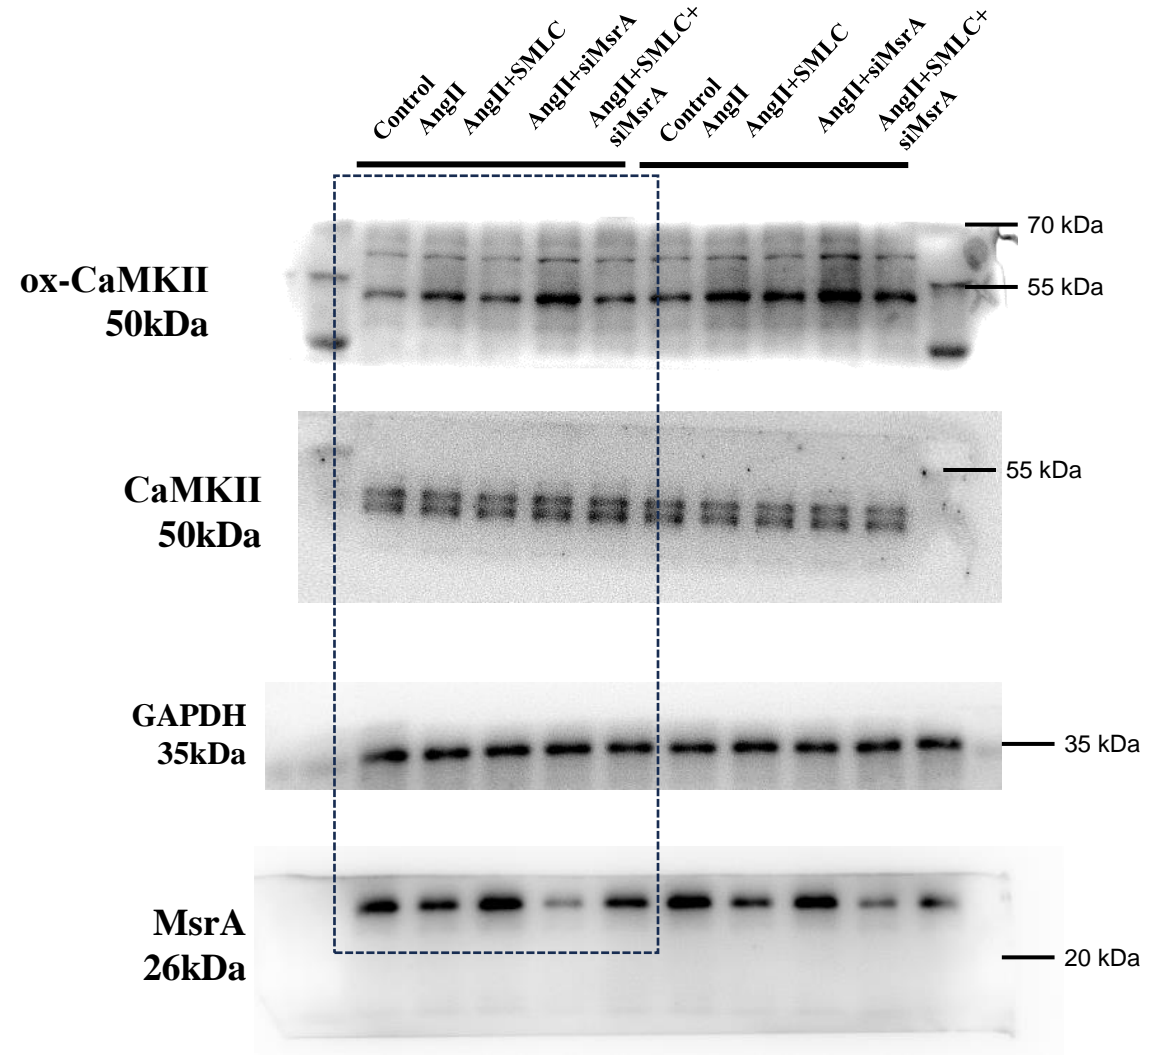

**Fig. 8D****Original figures of WB**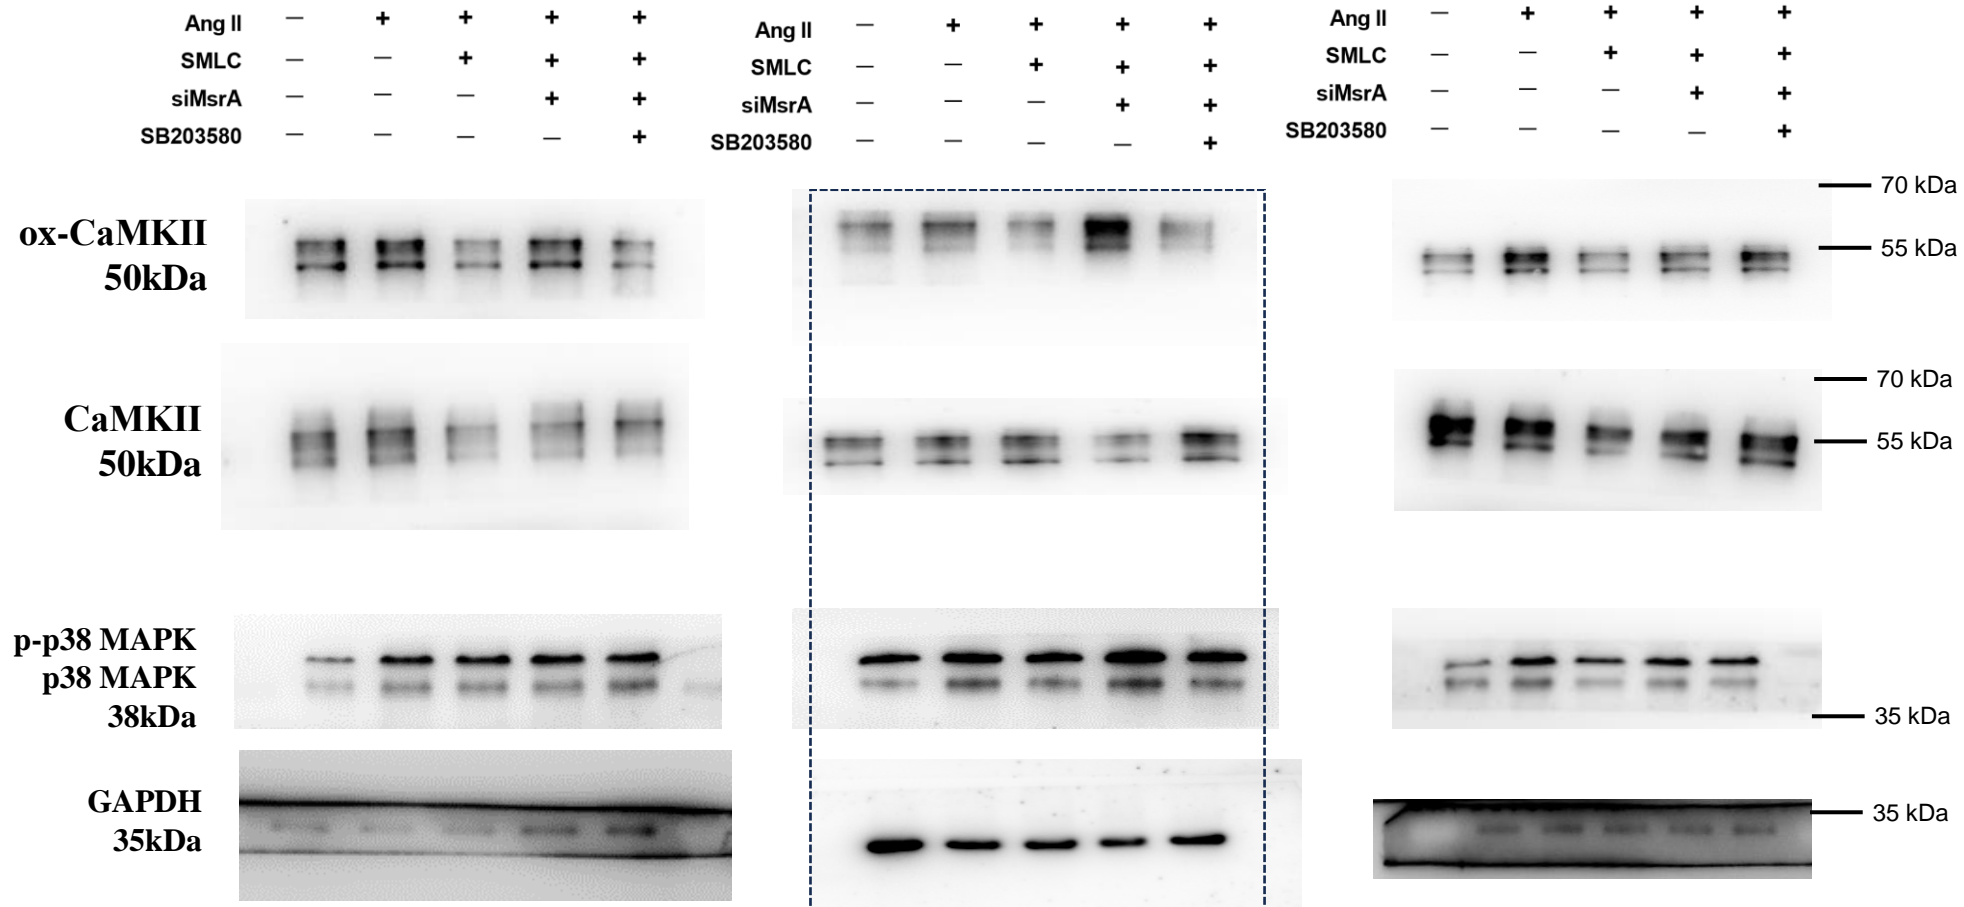

Supplement: d4fo03078h1.pdf [file d4fo03078h1.pdf]
